# Supplementary material for: New spinosaurids from the Wessex Formation (Early Cretaceous, UK) and the European origins of Spinosauridae
Source: PubMed Central journal article supplement (PMC8481559; doi:10.1038/s41598-021-97870-8), 2021-09-29
Supplement: 41598_2021_97870_MOESM2_ESM.pdf [file 41598_2021_97870_MOESM2_ESM.pdf]

|                                                                                                                               | Character statements<br># (character polarity arbitrary in this context; parentheses containing "Ch. XX" refer to equivalent characters used in our phylogenetic analyses) | <i>Ceratosaurs</i>                                                                                                                                                                                                                                                                             | <i>Riparovenator</i> | <i>Baryonyx</i> type | cf. <i>Suchomimus</i> ** | Caveats and points of consideration |                                                                                                                                                                                                                                                                                                                                                                                                                                                                                                                                                                                                                                |
|-------------------------------------------------------------------------------------------------------------------------------|----------------------------------------------------------------------------------------------------------------------------------------------------------------------------|------------------------------------------------------------------------------------------------------------------------------------------------------------------------------------------------------------------------------------------------------------------------------------------------|----------------------|----------------------|--------------------------|-------------------------------------|--------------------------------------------------------------------------------------------------------------------------------------------------------------------------------------------------------------------------------------------------------------------------------------------------------------------------------------------------------------------------------------------------------------------------------------------------------------------------------------------------------------------------------------------------------------------------------------------------------------------------------|
| <b>Unique characters observed in the Wessex Fm. specimens</b>                                                                 |                                                                                                                                                                            |                                                                                                                                                                                                                                                                                                |                      |                      |                          |                                     |                                                                                                                                                                                                                                                                                                                                                                                                                                                                                                                                                                                                                                |
| <i>Ceratosaurs</i>                                                                                                            | 1                                                                                                                                                                          | Basioccipital, width and position of the subcondylar recess: mediolaterally narrow and ventrally restricted (surface directly below condyle convex) (0); mediolaterally wide (~2/3 condyle width) and dorsoventrally tall (recess reaches the occipital condyle neck) (1) (see also Ch. 1191). | 0                    | 1                    | 1                        | 1                                   | Reversal of the wide megalosaur condition. Ambiguous due to individual/ontogenetic variability of pneumatic features (Chure and Madsen, 1996; Witmer 1990, 1997a, b; Sampson and Witmer 2007; Witmer and Ridgley 2010; Carr, 2020). Surface below condyle develops from convex ("large stage 1" specimens) to concave ("stage 3 specimens") during <i>Gorgosaurus</i> growth series (Carr, 1999: 519).                                                                                                                                                                                                                         |
|                                                                                                                               | 2                                                                                                                                                                          | Basisphenoid, excavation of the oval scars: shallow depressions (0); elongate, narrow sulci (1).                                                                                                                                                                                               | 1                    | 0                    | n/a                      | 0                                   | Oval scar excavation apomorphic for <i>Ceratosaurs</i> (see main text; row 37), <i>Ceratosaurs</i> could simply represent individual variation of this trait (albeit arguably extreme in terms of morphological difference).                                                                                                                                                                                                                                                                                                                                                                                                   |
|                                                                                                                               | 3                                                                                                                                                                          | Basisphenoid, width of the interbasiterygoid web: thin (0); thick (1).                                                                                                                                                                                                                         | 1                    | 0                    | 0                        | 0                                   | Ambiguous if individual variability affecting pneumatic features bordering it; Web becomes thicker during <i>Tyrannosaurus</i> ontogeny (Carr, 2020: ch 1050 – blade-like in young adults, long and convex in adults), although Wealden Supergroup spinosaurids do not display blade-like morphology.                                                                                                                                                                                                                                                                                                                          |
|                                                                                                                               | 4                                                                                                                                                                          | Supraoccipital, dorsal process, posterior surface in coronal view (below more dorsally positioned sulcus): gently curved (0); V-shaped or produces a midline ridge (1).                                                                                                                        | 0                    | 1                    | 1                        | 1                                   | Variation in ridge presence and development is present in various coelurosaurs and may characterise early members of the clade (Bever et al., 2013). Midline ridge present in <i>Irritator</i> also (Sues et al., 2002).                                                                                                                                                                                                                                                                                                                                                                                                       |
| <i>Riparovenator</i>                                                                                                          | 5                                                                                                                                                                          | Premaxilla, shape of pm1 tooth/alveolus relative to pm2: pm1 at least half the size of pm2 (0); pm1 less than half the size of pm2 (1).                                                                                                                                                        | 0                    | 1                    | 0                        | 0                                   | Heterodonty exhibited by spinosaurids generally; possibly too variable to be taxonomically useful (C. Hendrickx, pers. comm. 2021).                                                                                                                                                                                                                                                                                                                                                                                                                                                                                            |
|                                                                                                                               | 6                                                                                                                                                                          | Frontal, prefrontal contact in dorsal view: prefrontal articulates along anterior surface of the frontal postorbital process, no notch (0); prefrontal does not contact frontal postorbital process, notch present (1) (see also Ch. 1498)                                                     | 0                    | 1                    | 0                        | 0                                   | Possibly an immature trait displaying incomplete closure in <i>Riparovenator</i> ; Orbital notch closure ontogenetically and individually variable in <i>Tyrannosaurus</i> (Carr, 2020: Ch 90)                                                                                                                                                                                                                                                                                                                                                                                                                                 |
|                                                                                                                               | 7                                                                                                                                                                          | Prootic, visibility of the facial nerve (CN VII) foramen in lateral view: foramen visible (0); foramen largely obscured by thick otosphenoal crest (1).                                                                                                                                        | 0                    | 1                    | 0                        | 0                                   |                                                                                                                                                                                                                                                                                                                                                                                                                                                                                                                                                                                                                                |
|                                                                                                                               | 8                                                                                                                                                                          | Basioccipital, depth of the subcondylar recess: shallow, depth less than 1/5 of recess mediolateral width (0); deep, depth over 1/3 recess mediolateral width (1).                                                                                                                             | 0                    | 1                    | 0                        | 0                                   | Potentially ambiguous due to variability of pneumatic features (see above); surface ventral to the condyle convex to concave (in <i>Daspletosaurus</i> ) (Carr, 1999: 519). However, excavation of "ventral plate" (deep vs shallow) helped distinguish <i>Daspletosaurus horneri</i> and <i>D. torosus</i> (Carr et al., 2017); whilst "subcondylar recess" depth changes during <i>Tyrannosaurus</i> ontogeny (Carr, 2020: Ch 111 – deep in large juveniles, shallow by young adult stage), these refer to different set of pneumatic features not situated directly ventral to condyle (see also Witmer and Ridgley, 2009). |
| <b>Potentially obsolescent/ambiguous "unique" characters in <i>Ceratosaurs</i> or <i>Riparovenator</i></b>                    |                                                                                                                                                                            |                                                                                                                                                                                                                                                                                                |                      |                      |                          |                                     |                                                                                                                                                                                                                                                                                                                                                                                                                                                                                                                                                                                                                                |
| <i>Ceratosaurs</i>                                                                                                            | 9                                                                                                                                                                          | Premaxillae, antenaral tuberosities (located on the anterior margin of external narial margin): absent (0); present (1).                                                                                                                                                                       | 1                    | ?                    | 0                        | 0                                   |                                                                                                                                                                                                                                                                                                                                                                                                                                                                                                                                                                                                                                |
|                                                                                                                               | 10                                                                                                                                                                         | Premaxilla, subnarial process, length: subequal to or more than (0); less than (1) the length of the buccal margin of the premaxilla (Ch. 752)                                                                                                                                                 | 1                    | ?                    | ?                        | 0                                   | Process lengths generally variable (Molnar 1990), longer process in <i>Suchomimus</i> affects slightly larger specimen; Ontogenetic/individual variation observed in <i>Tyrannosaurus</i> (Carr, 2020: Ch 265 – some adults display immature "short" state, despite mature state already acquired by some young adult morphs).                                                                                                                                                                                                                                                                                                 |
|                                                                                                                               | 11                                                                                                                                                                         | Skull roof, path of the frontoparietal suture: V-shaped (0); "step"-like (initially transverse medially, before trending posteriorly a short distance and regaining a transverse orientation laterally) (1); sigmoidal (2)                                                                     | 0                    | 1                    | ?                        | 2                                   | Frontoparietal suture changes observed in tyrannosaurid ontogeny (Carr, 2020: Ch92 – some adult <i>Tyrannosaurus</i> display immature "wedge-shaped" state, vice versa for some large juveniles; Carr and Williamson, 2004); however frontoparietal contact differences helped distinguish <i>Daspletosaurus horneri</i> and <i>D. torosus</i> (Carr et al., 2017).                                                                                                                                                                                                                                                            |
|                                                                                                                               | 12                                                                                                                                                                         | Otoccipitals, angle of projection of paroccipital processes: laterally (sub-horizontally) (0); posterolaterally (1).                                                                                                                                                                           | 1                    | ?                    | 0                        | ?                                   | Variation in projection angle apparently observed in some tyrannosaurid taxa (development from more posterior to more lateral projection) (Bever et al., 2013: 19).                                                                                                                                                                                                                                                                                                                                                                                                                                                            |
|                                                                                                                               | 13                                                                                                                                                                         | Otoccipitals, anterior margin of the facet on the dorsal paroccipital process: angular, margin projects anteriorly (0); curved, minimal anterior projection (1).                                                                                                                               | 1                    | 0*                   | 0*                       | ?                                   | *Potentially ambiguous as the right otoccipitals in <i>Baryonyx</i> and <i>Riparovenator</i> are missing lateral part of the process; unable to test for intra-individual variation in facet shape.                                                                                                                                                                                                                                                                                                                                                                                                                            |
|                                                                                                                               | 14                                                                                                                                                                         | Basisphenoid, basisphenoid recess, dorsoventral extent: recess short and does not extend far under basioccipital (0); extends dorsally under basioccipital apron (1)                                                                                                                           | 0                    | 1                    | 1                        | ?                                   | Ambiguous due to individual variability of pneumatic features. See Duffeau (2011) for <i>Baryonyx</i> .                                                                                                                                                                                                                                                                                                                                                                                                                                                                                                                        |
|                                                                                                                               | 15                                                                                                                                                                         | Cultriform process, direction of projection of process tip (relative to the horizontally oriented skull roof): anteriorly (0); anteroventrally (1).                                                                                                                                            | 0                    | 1                    | ?                        | ?                                   | Strongly arched processes observed in <i>Tyrannosaurus</i> ontogeny (Witmer and Ridgley, 2009 – on basis CMNH 7541 " <i>Nanotyrannus</i> " is a immature morph of <i>Tyrannosaurus</i> ) and <i>D. torosus</i> (Carr, 1999: 507).                                                                                                                                                                                                                                                                                                                                                                                              |
|                                                                                                                               | 16                                                                                                                                                                         | Occiput, crista tuberalis (=metotic strut), mediolateral width across opposing cristae in posterior view: less than (0); more than (1) 1/2 the dorsoventral depth of the braincase from the dorsal tip of the supraoccipital to the ventral tip of the basal tubera (ch 1014).                 | 0                    | ?                    | 1                        | ?                                   | Possibly influenced by ontogenetic variation in paraoccipital process projection (see also #12)                                                                                                                                                                                                                                                                                                                                                                                                                                                                                                                                |
| <i>Riparovenator</i>                                                                                                          | 17                                                                                                                                                                         | Nasal, cruciform process, shape of posterodorsal margin (i.e. dorsal margin of the frontal process) in lateral view: straight (0); curved (1).                                                                                                                                                 | ?                    | 1                    | 0                        | ?                                   |                                                                                                                                                                                                                                                                                                                                                                                                                                                                                                                                                                                                                                |
|                                                                                                                               | 18                                                                                                                                                                         | Skull roof, path of the frontoparietal suture: V-shaped (0); "step"-like (initially transverse medially, before trending posteriorly a short distance and regaining a transverse orientation laterally) (1); sigmoidal (2)                                                                     | 0                    | 1                    | ?                        | 2                                   | Replicate (see #11)                                                                                                                                                                                                                                                                                                                                                                                                                                                                                                                                                                                                            |
|                                                                                                                               | 19                                                                                                                                                                         | Dorsum sellae, shape of the dorsal margin in anterior view: V-shaped (0); sub horizontal (1).                                                                                                                                                                                                  | 0*                   | 1                    | 0                        | ?                                   | *based on mirroring the undamaged right side of the dorsum sellae.                                                                                                                                                                                                                                                                                                                                                                                                                                                                                                                                                             |
|                                                                                                                               | 20                                                                                                                                                                         | Cultriform process, direction of projection of process tip (relative to the horizontally oriented skull roof): anteriorly (0); anteroventrally (1).                                                                                                                                            | 0                    | 1                    | ?                        | ?                                   | Replicate (see #15)                                                                                                                                                                                                                                                                                                                                                                                                                                                                                                                                                                                                            |
|                                                                                                                               | 21                                                                                                                                                                         | Cultriform process, subdivision of the subsellar recess by thin lamina: absent (0); present (1)                                                                                                                                                                                                | ?                    | 1                    | ?                        | ?                                   | Pneumatic features generally variable, comparative sample unknown for baryonychines.                                                                                                                                                                                                                                                                                                                                                                                                                                                                                                                                           |
|                                                                                                                               | 22                                                                                                                                                                         | Basisphenoid, basiptyergoid process, shape of lateral margin in ventral view: convex (0); concave (1).                                                                                                                                                                                         | 0                    | 1                    | ?                        | 0                                   |                                                                                                                                                                                                                                                                                                                                                                                                                                                                                                                                                                                                                                |
|                                                                                                                               | 23                                                                                                                                                                         | Basisphenoid, basiptyergoid process, exposure of the ventral surface in lateral view: thick (0); reduced (1).                                                                                                                                                                                  | 0                    | 1*                   | ?                        | 0                                   | *minor damage to left process' ventral margin                                                                                                                                                                                                                                                                                                                                                                                                                                                                                                                                                                                  |
|                                                                                                                               | 24                                                                                                                                                                         | Caudal vertebrae, anteroposterior width of anterior neural spines: narrow (0); wide (1).                                                                                                                                                                                                       | ?                    | 0                    | 1*                       | 1                                   | *Fragmentary evidence suggest some breadth in <i>Baryonyx</i> (Charig and Milner, 1990, 1997); Comparisons potentially affected by non-overlapping elements. Anterior caudal neural spines also anteroposteriorly narrow in <i>Ichthyovenator</i> .                                                                                                                                                                                                                                                                                                                                                                            |
|                                                                                                                               | 25                                                                                                                                                                         | Caudal vertebrae, anterior neural arches, ventral rib laminae: absent (0); present (1) (Ch. 358)                                                                                                                                                                                               | ?                    | 0                    | 1                        | ?                                   | Not unique as <i>Vallibonavenatrix</i> is also scored the same (taxon recovered as baryonychine in parsimony analysis.); Comparisons potentially affected by non-overlapping elements e.g. more distal anterior <i>Ichthyovenator</i> caudals appear to lack ventral rib lamina relative to laminated anteriormost element.                                                                                                                                                                                                                                                                                                    |
|                                                                                                                               | 26                                                                                                                                                                         | Caudal vertebrae, anterior neural arches, hyosphene: absent (0); present (1) (Ch. 359).                                                                                                                                                                                                        | ?                    | 0                    | 1                        | ?                                   | Not unique as <i>Vallibonavenatrix</i> is also scored the same (taxon recovered as baryonychine in parsimony analysis.);                                                                                                                                                                                                                                                                                                                                                                                                                                                                                                       |
|                                                                                                                               | 27                                                                                                                                                                         | Caudal vertebrae, constriction of the centrum midpoint: less than (0) or more than (1) 40% anterior facet width.                                                                                                                                                                               | ?                    | 1                    | 0                        | ?                                   | Possibly allometric, state 1 affects larger specimen; overlap of vertebrae uncertain.                                                                                                                                                                                                                                                                                                                                                                                                                                                                                                                                          |
| <b>Further Comparisons: Characters shared between both Wessex Fm. specimens but not other baryonychines</b>                   |                                                                                                                                                                            |                                                                                                                                                                                                                                                                                                |                      |                      |                          |                                     |                                                                                                                                                                                                                                                                                                                                                                                                                                                                                                                                                                                                                                |
| <i>Ceratosaurs + Riparovenator</i>                                                                                            | 28                                                                                                                                                                         | Premaxilla, paradenaral plates: absent (0); present (1)                                                                                                                                                                                                                                        | 0*                   | 0*                   | 1                        | 1                                   | *Possibly taphonomic.                                                                                                                                                                                                                                                                                                                                                                                                                                                                                                                                                                                                          |
|                                                                                                                               | 29                                                                                                                                                                         | Premaxilla, interalveolar space between 3rd and 4th alveoli, mesiodistal diameter: less (0); subequal or more (1) than ½ of 4th alveolus mesiodistal diameter (Ch. 512)                                                                                                                        | 0                    | 0                    | 1                        | 1                                   | Interalveolar space can be variable in baryonychines, and heterodonty exhibited by spinosaurids generally. State 1 present in juvenile spinosaurid premaxillae (Lakin and Longrich, 2019), suggesting character not influenced by ontogeny (but sample size low).                                                                                                                                                                                                                                                                                                                                                              |
|                                                                                                                               | 30                                                                                                                                                                         | Basioccipital, ventral occipital condyle margin in ventral view: V-shaped (0); gently curved (1)                                                                                                                                                                                               | 1                    | 1                    | 0                        | 0                                   | Ventral condyle shape ontogenetically and individually variable in tyrannosaurids (Carr, 2020: Ch 1020 – immature state observed in some adult <i>Tyrannosaurus</i> ). Left ventrolateral margin in cf. <i>Suchomimus</i> possibly slightly damaged.                                                                                                                                                                                                                                                                                                                                                                           |
| <b>Further Comparisons: Characters shared between both Wessex Fm. specimens and <i>Suchomimus</i> but not <i>Baryonyx</i></b> |                                                                                                                                                                            |                                                                                                                                                                                                                                                                                                |                      |                      |                          |                                     |                                                                                                                                                                                                                                                                                                                                                                                                                                                                                                                                                                                                                                |
|                                                                                                                               | 31                                                                                                                                                                         | Enamel ornamentation*: lingually only (0); labially and lingually (1).                                                                                                                                                                                                                         | 1                    | 1                    | 0                        | 1                                   | *Enamel ornamentation variable and potentially of limited significance (Fowler, 2007; Hendrickx et al., 2016, 2019).                                                                                                                                                                                                                                                                                                                                                                                                                                                                                                           |

|                                                                                                                    |                                                                                                                                                                                                                                                                                                                                                                      |                                                                                                                                                                                                                                                                 |   |   |    |                                                                                                                                                                                                                              |                                                                                                                                                                                                                                                                                                                                                                                                                                                                                                              |
|--------------------------------------------------------------------------------------------------------------------|----------------------------------------------------------------------------------------------------------------------------------------------------------------------------------------------------------------------------------------------------------------------------------------------------------------------------------------------------------------------|-----------------------------------------------------------------------------------------------------------------------------------------------------------------------------------------------------------------------------------------------------------------|---|---|----|------------------------------------------------------------------------------------------------------------------------------------------------------------------------------------------------------------------------------|--------------------------------------------------------------------------------------------------------------------------------------------------------------------------------------------------------------------------------------------------------------------------------------------------------------------------------------------------------------------------------------------------------------------------------------------------------------------------------------------------------------|
| Ceratosaurs + Riparovenator + cf. Suchomimus                                                                       | 32                                                                                                                                                                                                                                                                                                                                                                   | Frontal, postorbital facet, anterior depth: less (0); more (1) than 2/5 facet length (Ch. 1053).                                                                                                                                                                | 1 | 1 | 0  | 1                                                                                                                                                                                                                            | Cranial facets may be generally variable (Molnar, 1990), deeper facets affect larger specimens; Ontogeny/individual variation affects postorbital frontal process shape (and thus frontal postorbital facet shape, which accommodates the process) in <i>Tyrannosaurus</i> (Carr, 2020: Ch 68, 69 – some young adults and adults display the immature "shorter" state re: facet height and length).                                                                                                          |
|                                                                                                                    | 33                                                                                                                                                                                                                                                                                                                                                                   | Frontal, postorbital facet, deep longitudinal slot for postorbital: absent (0); present (1) (Ch. 1761).                                                                                                                                                         | 1 | 1 | 0  | 1                                                                                                                                                                                                                            | Slot within frontal postorbital facet develops ontogenetically in <i>Tyrannosaurus</i> (Carr, 2020: Ch 919 – groove acquired by young adult stage), smallest specimen ( <i>Baryonyx</i> ) does not produce slot.                                                                                                                                                                                                                                                                                             |
|                                                                                                                    | 34                                                                                                                                                                                                                                                                                                                                                                   | Frontal, anterior margins of supratemporal fossa: poorly developed with little curvature (0) sharp and laterally curving (1).                                                                                                                                   | 1 | 1 | 0  | 1                                                                                                                                                                                                                            | Margins change shape (Carr, 1999) and become increasingly prominent in tyrannosaurids growth series but may be individually variable also (Carr, 2020: Ch 935 – some young adults and adults stages display immature state); Trait affects larger baryonychine specimens.                                                                                                                                                                                                                                    |
|                                                                                                                    | 35                                                                                                                                                                                                                                                                                                                                                                   | Basioccipital, ventral occipital condyle margin in posterior view: V-shaped, margins converge towards midline (0); gently curved (1).                                                                                                                           | 1 | 1 | 0  | 1                                                                                                                                                                                                                            | State 0 reminiscent of immature tyrannosaurid state (Carr, 1999; Carr, 2020: Ch 1018 – mature "reniform" state acquired by young adult stage in <i>Tyrannosaurus</i> ).                                                                                                                                                                                                                                                                                                                                      |
|                                                                                                                    | 36                                                                                                                                                                                                                                                                                                                                                                   | Basioccipital, contribution to foramen magnum margin: large, exoccipitals widely separated (0); reduced, exoccipitals closely placed (1) (Ch. 974).                                                                                                             | 1 | 1 | 0  | 1                                                                                                                                                                                                                            | Closely appressed exoccipitals also in <i>Irritator</i> (S. Evers, pers. comms. 2021). Some variation in at least one tyrannosaurid (reduced contact in an immature <i>Gorgosaurus</i> , space normally wider in tyrannosaurids – Bever et al 2013: 25). More tangentially, basioccipital contribution to foramen magnum increases in <i>Psittacosaurus</i> ontogeny (hatchling and juveniles: 15%, adults 30%) (Bullar et al., 2019) but may decrease in some ceratopsids (Longrich and Field, 2012: Ch 4). |
|                                                                                                                    | 37                                                                                                                                                                                                                                                                                                                                                                   | Basisphenoid, excavation of the collateral scars placed lateral to middle depression: absent (0); present and distinct on both sides (1) (Ch. 510).                                                                                                             | 1 | 1 | 0  | 1                                                                                                                                                                                                                            | Does affect a probably muscular insertion point (thus potential for individual variation in attachment morphology); "dished"/"concave" scars seen in adult tyrannosaurids (Carr, 1999).                                                                                                                                                                                                                                                                                                                      |
|                                                                                                                    | 38                                                                                                                                                                                                                                                                                                                                                                   | Basisphenoid, median recess, depth: shallow (0); deep (1) (Ch. 1566).                                                                                                                                                                                           | 1 | 1 | 0  | 1                                                                                                                                                                                                                            | Pneumatic features generally variable (see above).                                                                                                                                                                                                                                                                                                                                                                                                                                                           |
|                                                                                                                    | 39                                                                                                                                                                                                                                                                                                                                                                   | Basisphenoid, ridges (cf. cristae ventrolateralis of some) binding the median recess laterally: absent (0); present (1).                                                                                                                                        | 1 | 1 | 0  | 1                                                                                                                                                                                                                            | Probably redundant with scar excavation (see row 41); Increase in ridge prominence throughout <i>Tyrannosaurus</i> ontogeny (Carr, 2020: Ch 1044), however immature state in latter already contains ridged margins.                                                                                                                                                                                                                                                                                         |
|                                                                                                                    | 40                                                                                                                                                                                                                                                                                                                                                                   | Basisphenoid, posteroventral edge of interbasipterygoidal web in sagittal section: sharp (0); rounded (1).                                                                                                                                                      | 1 | 1 | 0  | 1                                                                                                                                                                                                                            | Web becomes thicker and convex during <i>Tyrannosaurus</i> ontogeny (blade-like in younger morphs; Carr, 2020: ch 1050).                                                                                                                                                                                                                                                                                                                                                                                     |
|                                                                                                                    | 41                                                                                                                                                                                                                                                                                                                                                                   | Otoccipital, number of cranial nerve foramina lateral to occipital condyle: two (0); three (1).                                                                                                                                                                 | 1 | 1 | 0  | 1                                                                                                                                                                                                                            | Number can be variable in <i>Tyrannosaurus</i> (Bever et al., 2013: 22), unknown if number of foramina phylogenetically informative at this stage (Brusatte et al., 2010).                                                                                                                                                                                                                                                                                                                                   |
| 42                                                                                                                 | Prefrontal, presence of a boss-like process: absent (0); present (1)                                                                                                                                                                                                                                                                                                 | 1                                                                                                                                                                                                                                                               | 1 | ? | 1  | *Prefrontal recovered but potentially damaged.                                                                                                                                                                               |                                                                                                                                                                                                                                                                                                                                                                                                                                                                                                              |
| <b>Further Comparisons: Characters shared by at least one Wessex Fm. specimen and Suchomimus, but not Baryonyx</b> |                                                                                                                                                                                                                                                                                                                                                                      |                                                                                                                                                                                                                                                                 |   |   |    |                                                                                                                                                                                                                              |                                                                                                                                                                                                                                                                                                                                                                                                                                                                                                              |
| Ceratosaurs + cf. Suchomimus                                                                                       | 43                                                                                                                                                                                                                                                                                                                                                                   | Premaxilla, narial fossa: absent (0); present (1) (Ch. 709).                                                                                                                                                                                                    | 1 | ? | 0  | 1                                                                                                                                                                                                                            | Limited data on narial fossa variation in theropods. Tangentially, variation observed in <i>Gavialis</i> (Hone et al., 2020).                                                                                                                                                                                                                                                                                                                                                                                |
|                                                                                                                    | 44                                                                                                                                                                                                                                                                                                                                                                   | Basioccipital, subcondylar recess bordered laterally by mediolaterally thick crests: absent (0); present (1).                                                                                                                                                   | 0 | 1 | 1  | 0                                                                                                                                                                                                                            | Individual and ontogenetic variation observed in <i>Tyrannosaurus</i> "ascending scars" (Carr, 2020: Ch 1024 – some adult morphs display immature "prominent" state).                                                                                                                                                                                                                                                                                                                                        |
| 45                                                                                                                 | Parietal, posterior rise of the nuchal crest in lateral view (angle measured in lateral view with the skull roof held horizontally; the vertex of the angle is located on the capitate process of the laterosphenoid (or preserved equivalent); the first ray projects to the dorsal nuchal crest; the second ray projects posteriorly): $\geq$ (0), or $<$ (1) 45°. | 1                                                                                                                                                                                                                                                               | ? | 0 | 1  | *Parietal damaged however general trend is likely comparable to that of cf. <i>Suchomimus</i> (42°) and <i>Ceratosaurs</i> (44°) rather than <i>Baryonyx</i> (70°).                                                          |                                                                                                                                                                                                                                                                                                                                                                                                                                                                                                              |
| <b>Further Comparisons: Characters shared between both Wessex Fm. specimen and Baryonyx but not Suchomimus</b>     |                                                                                                                                                                                                                                                                                                                                                                      |                                                                                                                                                                                                                                                                 |   |   |    |                                                                                                                                                                                                                              |                                                                                                                                                                                                                                                                                                                                                                                                                                                                                                              |
| Ceratosaurs + Riparovenator + Baryonyx                                                                             | 46                                                                                                                                                                                                                                                                                                                                                                   | Orbital margin, exposure of the orbital fossae in lateral view: orbital fossae visible (0); dorsal portion of orbital fossae partially obscured by overhang of the orbital rim (1).                                                                             | 0 | 0 | 0  | 1*                                                                                                                                                                                                                           | *Taphonomic in cf. <i>Suchomimus</i> ?                                                                                                                                                                                                                                                                                                                                                                                                                                                                       |
|                                                                                                                    | 47                                                                                                                                                                                                                                                                                                                                                                   | Basioccipital, proportions relative to basisphenoid (measured along midline ventral to occipital condyle to interbasipterygoidal web), in posterior view: basioccipital contribution shorter (0) or longer (1) than basisphenoid contribution.                  | 0 | 0 | 0  | 1                                                                                                                                                                                                                            |                                                                                                                                                                                                                                                                                                                                                                                                                                                                                                              |
|                                                                                                                    | 48                                                                                                                                                                                                                                                                                                                                                                   | Occiput, relationship between of basisphenoid oval scars and ventral portion of basioccipital apron: apron situated between oval scars (0); ventral plate overlaps oval scars (1)                                                                               | 1 | 1 | 1  | 0                                                                                                                                                                                                                            |                                                                                                                                                                                                                                                                                                                                                                                                                                                                                                              |
| 49                                                                                                                 | Basioccipital, foramina situated ventrolaterally occipital condyle: absent (0); present (1).                                                                                                                                                                                                                                                                         | 0                                                                                                                                                                                                                                                               | 0 | 0 | 1* | *Ambiguous as right side of <i>Suchomimus</i> not well exposed in available imagery. Observable foramina do not relate to foramina for X-XII.                                                                                |                                                                                                                                                                                                                                                                                                                                                                                                                                                                                                              |
| <b>Further Comparisons: Characters shared by at least one Wessex Fm. specimen and Baryonyx but not Suchomimus</b>  |                                                                                                                                                                                                                                                                                                                                                                      |                                                                                                                                                                                                                                                                 |   |   |    |                                                                                                                                                                                                                              |                                                                                                                                                                                                                                                                                                                                                                                                                                                                                                              |
| Ceratosaurs + Baryonyx                                                                                             | 50                                                                                                                                                                                                                                                                                                                                                                   | Premaxilla, subnarial process, slenderness: shorter than (0); longer than (1) 4 times its proximal depth (Ch. 697)                                                                                                                                              | 0 | ? | 0  | 1                                                                                                                                                                                                                            | See also #10                                                                                                                                                                                                                                                                                                                                                                                                                                                                                                 |
|                                                                                                                    | 51                                                                                                                                                                                                                                                                                                                                                                   | Premaxilla, dorsal midline: uncrested (0); crested (1)                                                                                                                                                                                                          | 0 | ? | 0  | 1                                                                                                                                                                                                                            |                                                                                                                                                                                                                                                                                                                                                                                                                                                                                                              |
|                                                                                                                    | 52                                                                                                                                                                                                                                                                                                                                                                   | Supraoccipital, dorsal process, width (measured between the foramina for the middle cerebral vein) relative to height (measured from a middle cerebral vein foramen to the tip of the dorsal process): width more than (0) or less than (1) 2/3 process height. | 0 | ? | 0  | 1                                                                                                                                                                                                                            | State 1 affects largest specimen, character could be allometrically variable.                                                                                                                                                                                                                                                                                                                                                                                                                                |
| 53                                                                                                                 | Supraoccipital, dorsal process, posterodorsal margins: in line with (0) or overhang (1) the rest of the dorsal process.                                                                                                                                                                                                                                              | 0                                                                                                                                                                                                                                                               | ? | 0 | 1* | *Overhang potentially related to the development of cervical musculature – process on dorsal end of supraoccipital identified as the tendinous insertion for the m. spinalis capitis in <i>Tyrannosaurus</i> (Tsujihi 2010). |                                                                                                                                                                                                                                                                                                                                                                                                                                                                                                              |
| Riparovenator + Baryonyx                                                                                           | 54                                                                                                                                                                                                                                                                                                                                                                   | Basioccipital, subcondylar recess bordered laterally by mediolaterally thick crests: absent (0); present (1).                                                                                                                                                   | 0 | 1 | 1  | 0                                                                                                                                                                                                                            | Replicate (see #44)                                                                                                                                                                                                                                                                                                                                                                                                                                                                                          |

\*\* cf. *Suchomimus* scores based on hypodigm of several specimens inc. MNN GDF 500, 501, 214

#### References

- Bever, G.S., Brusatte, S.L., Carr, T.D., Xu, X., Balanoff, A.M. and Norell, M.A. 2013. The braincase anatomy of the Late Cretaceous dinosaur *Alioramus* (Theropoda: Tyrannosauroidae). *Bulletin of the American Museum of Natural History*, 2013(376), pp.1-72.
- Brusatte, S.L., Chure, D.J., Benson, R.B. and Xu, X. 2010. The osteology of *Shaochilong maortuensis*, a carcharodontosaurid (Dinosauria: Theropoda) from the Late Cretaceous of Asia. *Zootaxa*, 2334(1), pp.1-46.
- Carpenter, K. 2010. Variation in a population of Theropoda (Dinosauria): *Allosaurus* from the Cleveland-Lloyd Quarry (Upper Jurassic), Utah, USA. *Paleontological research*, 14(4), pp.250-259.
- Carr, T.D. 1999. Craniofacial ontogeny in tyrannosauridae (Dinosauria, Coelurosauria). *Journal of vertebrate Paleontology*, 19(3), pp.497-520.
- Carr, T.D. 2020. A high-resolution growth series of *Tyrannosaurus rex* obtained from multiple lines of evidence. *PeerJ*, 8, p.e9192.
- Carr, T.D. and Williamson, T.E. 2004. Diversity of late Maastrichtian Tyrannosauridae (Dinosauria: Theropoda) from western North America. *Zoological Journal of the Linnean Society*, 142(4), pp.479-523.
- Carr, T. D., Varricchio, D. J., Sedlmayr, J. C., Roberts, E. M., and Moore, J. R. 2017. A new tyrannosaur with evidence for anagenesis and crocodile-like facial sensory system. *Scientific Reports* 7, pp. 1-11.
- Charig, A.J. and Milner, A.C. 1990. The systematic position of *Baryonyx walkeri*, in the light of Gauthier's reclassification of the Theropoda. In: *Dinosaur systematics, Approaches and Perspectives*, K. Carpenter and P. J. Currie (eds), pp. 127-140.
- Charig, A.J. and Milner, A.C. 1997. *Baryonyx walkeri*, a fish-eating dinosaur from the Wealden of Surrey. *Bulletin-Natural History Museum Geology Series*, 53, pp.11-70.
- Chure, D.J. and Madsen Jr, J.H. 1996. Variation in aspects of the tympanic pneumatic system in a population of *Allosaurus fragilis* from the Morrison Formation (Upper Jurassic). *Journal of Vertebrate Paleontology*, 16(1), pp.63-66.
- Duffeau, D. L. 2011. The Evolution of Cranial Pneumaticity in Archosauria: Patterns of Paratympanic Sinus Development. PhD Thesis, Ohio University.
- Fowler, D. 2007. Recently rediscovered baryonychine teeth (Dinosauria: Theropoda): New morphologic data, range extension & similarity to Ceratosaurs. *Journal of Vertebrate Paleontology* 27(3), pp. 76A
- Hendrickx, C., Mateus, O., Araújo, R. and Choiniere, J. 2019. The distribution of dental features in non-avian theropod dinosaurs: Taxonomic potential, degree of homoplasy, and major evolutionary trends. *Palaeontologia Electronica*, 22(3).
- Hone, D., Mallon, J.C., Hennessey, P. and Witmer, L.M. 2020. Ontogeny of a sexually selected structure in an extant archosaur *Gavialis gangeticus* (Pseudosuchia: Crocodylia) with implications for sexual dimorphism in dinosaurs. *PeerJ*, 8, p.e9134.
- Lakin, R.J. and Longrich, N.R. 2019. Juvenile spinosaurs (Theropoda: Spinosauridae) from the middle Cretaceous of Morocco and implications for spinosaur ecology. *Cretaceous Research*, 93, pp.129-142.
- Molnar, R.E. 1990. Variation in theory and in theropods. In: *Dinosaur systematics, Approaches and Perspectives*, K. Carpenter and P. J. Currie (eds), pp. 71-79.
- Sampson, S.D. and Witmer, L.M. 2007. Craniofacial anatomy of *Majungasaurus crenatissimus* (Theropoda: Abelisauridae) from the late Cretaceous of Madagascar. *Journal of Vertebrate Paleontology*, 27(S2), pp.32-104.
- Sues, H.D., Frey, E., Martill, D.M. and Scott, D.M. 2002. *Irritator challengeri*, a spinosaurid (Dinosauria: Theropoda) from the Lower Cretaceous of Brazil. *Journal of Vertebrate Paleontology*, 22(3), pp.535-547.
- Tsujihi, T. 2010. Reconstructions of the axial muscle insertions in the occipital region of dinosaurs: evaluations of past hypotheses on Marginocephalia and Tyrannosauridae using the Extant Phylogenetic Bracket approach. *The Anatomical Record*:

Advances in Integrative Anatomy and Evolutionary Biology, 293(8), pp.1360-1386.

Witmer, L.M., 1990. The craniofacial air sac system of Mesozoic birds (Aves). Zoological Journal of the Linnean Society, 100(4), pp.327-378.

Witmer, L. M. 1997a. Craniofacial air sinus systems, in: The Encyclopedia of Dinosaurs, P. J. Currie and K. Padian (eds.), Academic Press, New York, pp. 151– 159

Witmer, L.M. 1997b. The evolution of the antorbital cavity of archosaurs: a study in soft-tissue reconstruction in the fossil record with an analysis of the function of pneumaticity. Journal of Vertebrate Paleontology, 17(S1), pp.1-76.

Witmer, L.M. and Ridgely, R.C. 2009. New insights into the brain, braincase, and ear region of tyrannosaurs (Dinosauria, Theropoda), with implications for sensory organization and behavior. The Anatomical Record: Advances in Integrative Anatomy and Evolutionary Biology, 292(9), pp.1266-1296.

Witmer, L.M. and Ridgely, R.C. 2010. The Cleveland tyrannosaur skull (*Nanotyrannus* or *Tyrannosaurus*): new findings based on CT scanning, with special reference to the braincase. Kirtlandia, 57, pp.61-81.
